# Supplementary figures and images for: Prevalence of Psychological Symptoms in Patients Undergoing Pancreatoduodenectomy and Results of a Distress Management System: A Clinic-Based Study
Source: PubMed Central journal article supplement — Cancer Res Treat. 2022 Jan 4;54(4):1138–47. doi: 10.4143/crt.2021.842 (PMC9582477; doi:10.4143/crt.2021.842), 2022-01-04

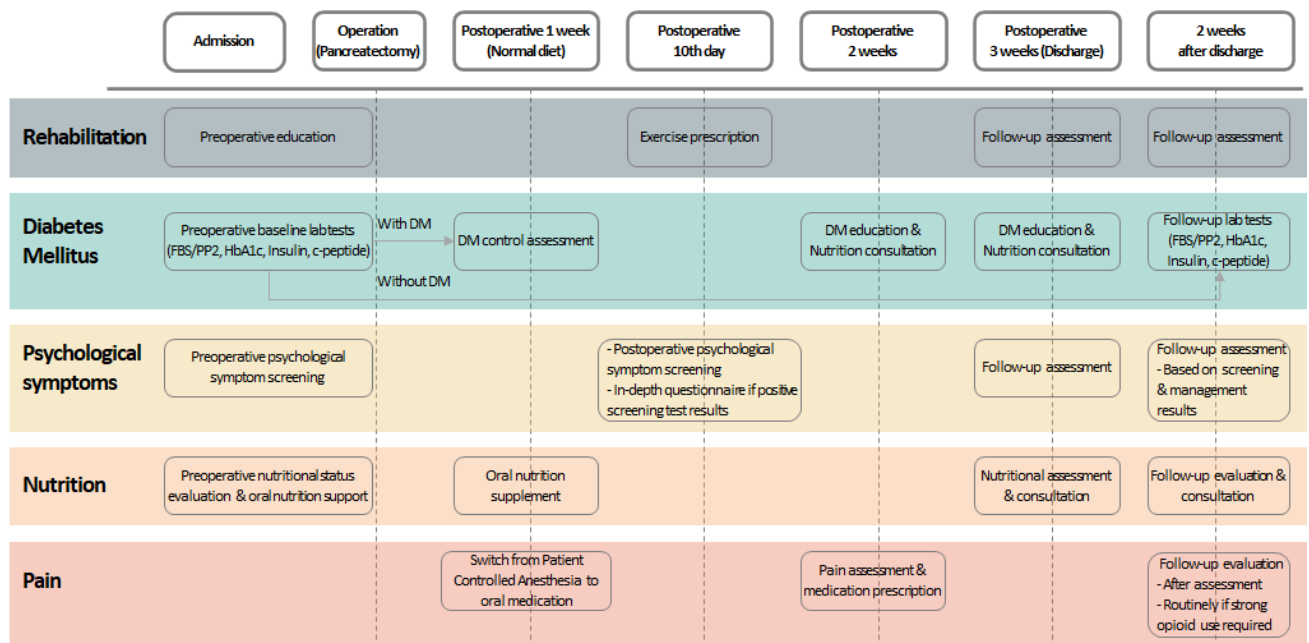

**S1 Fig.** Components of the integrated supportive care system.

Supplement: crt-2021-842_S1-Fig.pdf [file crt-2021-842_S1-Fig.pdf]
